# Supplementary material for: Different types of cartilage neotissue fabricated from collagen hydrogels and mesenchymal stromal cells via SOX9, TGFB1 or BMP2 gene transfer
Source: PLoS One. 2020 Aug 13;15(8):e0237479. doi: 10.1371/journal.pone.0237479 (PMC7425924; doi:10.1371/journal.pone.0237479)
Supplement: S1 Data — (XLSX) [file pone.0237479.s003.xlsx]

## Sheet: Tabelle1
Rohdaten	Ef1a	MW EF1 a	Col II	Col X	SOX 9	ALP		dct Col II	dCT Col X	dt CT SOX9	d CT ALP		ddct Col II	d CT Col X	ddCT SOX 9	ddCT ALP		Ratio Coll II	Ratio Col X	Ratio SOX 9	Ratio ALP
GFP 3	34.17	35.0533	27.73	23.85	25.62	24.72		-7.32333	-11.2033	-9.43333	-10.3333
	35.48	35.0533	29.11	25.2	26.1	25.06		-5.94333	-9.85333	-8.95333	-9.99333
	35.51	35.0533	28.37	25.08	26.48	25.06		-6.68333	-9.97333	-8.57333	-9.99333
GFP 7	21.72	24.69	24.66	24.54	22.53	23.54		-0.03	-0.15	-2.16	-1.15
	25.21	24.69	24.94	25.35	22.43	23.5		0.25	0.66	-2.26	-1.19
	27.14	24.69	24.01	25.27	22.75	24.05		-0.68	0.58	-1.94	-0.64
GFP14	27.46	23.64	26.27	22.32	24.58	23.13		2.63	-1.32	0.94	-0.51
	21.94	23.64	26.81	22.43	25.11	23.19		3.17	-1.21	1.47	-0.45
	21.52	23.64	26.73	22.76	24.7	23.07		3.09	-0.88	1.06	-0.57
GFP21	21.82	20.9767	24.22	24.22	23.72	23.32		3.24333	3.24333	2.74333	2.34333
	23.13	20.9767	24.34	24.72	24.31	23.44		3.36333	3.74333	3.33333	2.46333
	17.98	20.9767	24.63	24.29	24.03	23.17		3.65333	3.31333	3.05333	2.19333
SOX 3	19.64	20.88	26.98	24.12	17.84	23.99		6.1	3.24	-3.04	3.11		13.4233	14.4433	6.39333	13.4433		9.10278e-05	4.48873e-05	0.0118964	8.97746e-05		Mittelwert Col II
	20.81	20.88	27.12	25.14	18.26	24.31		6.24	4.26	-2.62	3.43		12.1833	14.1133	6.33333	13.4233		0.000215006	5.64239e-05	0.0124016	9.10278e-05			Day 3	Day 7	Day 14	Day 21
	22.19	20.88	28.29	25.24	18.1	23.86		7.41	4.36	-2.78	2.98		14.0933	14.3333	5.79333	12.9733		5.72116e-05	4.84436e-05	0.0180315	0.000124348		SOX-9	0.000121082	0.0686499	452.308	1000.94
SOX 7	23.95	26.0167	30.19	27.5	22.27	24.72		4.17333	1.48333	-3.74667	-1.29667		4.20333	1.63333	-1.58667	-0.146667		0.0542838	0.322343	3.00355	1.10701		TGF-β1	0.000810659	0.200548	2030.54	3969.1
	25.04	26.0167	29.27	27.09	21.85	24.3		3.25333	1.07333	-4.16667	-1.71667		3.00333	0.413333	-1.90667	-0.526667		0.124712	0.750886	3.74942	1.4406		BMP-2	0.0629791	0.0568806	42.3033	189.239
	29.06	26.0167	30.55	27.31	22.14	24		4.53333	1.29333	-3.87667	-2.01667		5.21333	0.713333	-1.93667	-1.37667		0.0269544	0.609909	3.8282	2.59668
SOX 14	20.43	21.17	15.23	25.49	18.32	23.35		-5.94	4.32	-2.85	2.18		-8.57	5.64	-3.79	2.69		380.038	0.0200535	13.8326	0.154963
	21.19	21.17	15.1	24.91	17.38	24.03		-6.07	3.74	-3.79	2.86		-9.24	4.95	-5.26	3.31		604.668	0.032352	38.3193	0.10083
	21.89	21.17	15.72	25.08	18.28	23.99		-5.45	3.91	-2.89	2.82		-8.54	4.79	-3.95	3.39		372.217	0.0361465	15.455	0.0953912		STABW
SOX 21	20.44	21.31	14.47	26.53	17.89	24.13		-6.84	5.22	-3.42	2.82		-10.0833	1.97667	-6.16333	0.476667		1084.89	0.254076	71.6718	0.718636			Day 3	Day 7	Day 14	Day 21
	22.19	21.31	15.69	25.75	17.62	24.24		-5.62	4.44	-3.69	2.93		-8.98333	0.696667	-7.02333	0.466667		506.119	0.616996	130.087	0.723635		SOX-9	0	0.0504371	132.006	458.646
	21.3	21.31	14.5	25.92	17.84	24.07		-6.81	4.61	-3.47	2.76		-10.4633	1.29667	-6.52333	0.566667		1411.81	0.407066	91.9854	0.675175		TGF-β1	0.000277281	0.0769936	91.7099	923.439
TGF 3	23.16	22.5533	26.07	19.41	23.25	23.11		3.51667	-3.14333	0.696667	0.556667		10.84	8.06	10.13	10.89		0.00054555	0.00374713	0.000892414	0.000526967		BMP-2	0.0628941	0.0412181	21.585	90.7341
	23.95	22.5533	26.44	20.54	23.9	23.49		3.88667	-2.01333	1.34667	0.936667		9.83	7.84	10.3	10.93		0.00109869	0.0043644	0.000793215	0.000512557
	20.55	22.5533	26.18	20.09	23.11	23.32		3.62667	-2.46333	0.556667	0.766667		10.31	7.51	9.13	10.76		0.000787736	0.00548611	0.00178483	0.000576657
TGF 7	23.39	21.4067	23.3	20.02	22.73	22.29		1.89333	-1.38667	1.32333	0.883333		1.92333	-1.23667	3.48333	2.03333		0.263645	2.35653	0.0894154	0.24429
	22.39	21.4067	23.82	20.09	22.75	22.13		2.41333	-1.31667	1.34333	0.723333		2.16333	-1.97667	3.60333	1.91333		0.22324	3.93583	0.0822789	0.265478		Mittelwert Col X
	18.44	21.4067	23.85	19.64	22.61	22.05		2.44333	-1.76667	1.20333	0.643333		3.12333	-2.34667	3.14333	1.28333		0.114758	5.08648	0.113178	0.410845			Day 3	Day 7	Day 14	Day 21
TGF 14	35.32	33.9333	25.51	28.9	30.14	27.91		-8.42333	-5.03333	-3.79333	-6.02333		-11.0533	-3.71333	-4.73333	-5.51333		2125.13	13.1167	26.5996	45.675		SOX-9	0	0.561046	0.0295174	0.426046
	38.57	33.9333	26.18	30.56	31.16	26.13		-7.75333	-3.37333	-2.77333	-7.80333		-10.9233	-2.16333	-4.24333	-7.35333		1942.01	4.47949	18.9396	163.521		TGF-β1	0.00453255	3.79295	9.61925	5729.78
	27.91	33.9333	26.04	29.56	32.16	27.03		-7.89333	-4.37333	-1.77333	-6.90333		-10.9833	-3.49333	-2.83333	-6.33333		2024.48	11.2615	7.12719	80.6349		BMP-2	0.000235854	0.193979	2.62196	1289.81
TGF 21	24.21	24.3633	15.38	14.94	20.85	18.48		-8.98333	-9.42333	-3.51333	-5.88333		-12.2267	-12.6667	-6.25667	-8.22667		4792.85	6501.99	76.4618	299.553
	30.75	24.3633	15.71	15.8	22.94	18.34		-8.65333	-8.56333	-1.42333	-6.02333		-12.0167	-12.3067	-4.75667	-8.48667		4143.59	5066.12	27.0333	358.708
	18.13	24.3633	16.48	15.22	21.98	17.7		-7.88333	-9.14333	-2.38333	-6.66333		-11.5367	-12.4567	-5.43667	-8.85667		2970.86	5621.22	43.3112	463.577
BMP 3	32.24	31.56	27.16	33.97	33.71	24.25		-4.4	2.41	2.15	-7.31		2.92333	13.6133	11.5833	3.02333		0.131822	7.97955e-05	0.000325889	0.122995		STABW Col X
	34.22	31.56	32.49	33.48	28.69	25.01		0.93	1.92	-2.87	-6.55		6.87333	11.7733	6.08333	3.44333		0.00852944	0.000285676	0.014748	0.0919292			Day 3	Day 7	Day 14	Day 21
	28.22	31.56	29.24	33.1	34.01	25.01		-2.32	1.54	2.45	-6.55		4.36333	11.5133	11.0233	3.44333		0.0485854	0.000342091	0.000480448	0.0919292		SOX-9	0	0.218411	0.00841264	0.182203
BMP 7	25.16	23.8	28.58	26.6	26.27	23.61		4.78	2.8	2.47	-0.19		4.81	2.95	4.63	0.96		0.0356489	0.129408	0.040386	0.514057		TGF-β1	0.000881603	1.37057	4.54678	724.065
	22.7	23.8	27.31	27.11	26.44	24		3.51	3.31	2.64	0.2		3.26	2.65	4.9	1.39		0.104386	0.15932	0.0334929	0.381565		BMP-2	0.000138063	0.0872272	0.604683	99.3185
	23.54	23.8	28.15	26.15	25.05	24.14		4.35	2.35	1.25	0.34		5.03	1.77	3.19	0.98		0.0306069	0.293209	0.109576	0.50698
BMP 14	31.12	33.13	30	30.59	32.76	24.44		-3.13	-2.54	-0.37	-8.69		-5.76	-1.22	-1.31	-8.18		54.1917	2.32947	2.47942	290.018
	34.84	33.13	30.51	30.19	30.66	24.23		-2.62	-2.94	-2.47	-8.9		-5.79	-1.73	-3.94	-8.45		55.3304	3.31728	15.3482	349.706
	33.43	33.13	32.1	31.1	34.88	24.88		-1.03	-2.03	1.75	-8.25		-4.12	-1.15	0.69	-7.68		17.3878	2.21914	0.619854	205.074		Mittlewert SOX 9
BMP 21	19.92	19.8467	15.07	12.89	23.8	13.2		-4.77667	-6.95667	3.95333	-6.64667		-8.02	-10.2	1.21	-8.99		259.574	1176.27	0.432269	508.463			Day 3	Day 7	Day 14	Day 21
	19.58	19.8467	16.77	13.21	23.95	13.41		-3.07667	-6.63667	4.10333	-6.43667		-6.44	-10.38	0.77	-8.9		86.8227	1332.57	0.586417	477.713		SOX-9	0.0141098	3.52706	22.5356	97.9147
	20.04	19.8467	15.71	12.75	24.25	13.48		-4.13667	-7.09667	4.40333	-6.36667		-7.79	-10.41	1.35	-8.56		221.322	1360.57	0.392292	377.413		TGF-β1	0.00115682	0.0578264	17.5555	48.9354
IHHBMP3	28.16	27.64	29.88	27.61	19.89	27.31		2.24	-0.03	-7.75	-0.33		9.56333	11.1733	1.68333	10.0033		0.00132175	0.000433004	0.311362	0.000974309		BMP-2	0.00518479	0.0611516	6.14917	0.470326
	27.5	27.64	30.37	28.09	18.72	27.15		2.73	0.45	-8.92	-0.49		8.67333	10.3033	0.0333333	9.50333		0.00244944	0.000791385	0.97716	0.00137788
	27.26	27.64	30.24	27.34	18.29	26.79		2.6	-0.3	-9.35	-0.85		9.28333	9.67333	-0.776667	9.14333		0.00160486	0.00122472	1.71317	0.00176841
IHHBMP 7	24.81	24.7833	27.44	21.84	19.8	24.39		2.65667	-2.94333	-4.98333	-0.393333		2.68667	-2.79333	-2.82333	0.756667		0.155322	6.9323	7.07796	0.591862
	25.37	24.7833	28.54	22.55	20.05	24.88		3.75667	-2.23333	-4.73333	0.0966667		3.50667	-2.89333	-2.47333	1.28667		0.0879808	7.42985	5.55325	0.409897		STABW
	24.17	24.7833	25.83	22.31	19.27	24.39		1.04667	-2.47333	-5.51333	-0.393333		1.72667	-3.05333	-3.57333	0.246667		0.302149	8.30128	11.9037	0.842842			Day 3	Day 7	Day 14	Day 21
IHHBMP14	25.37	24.9367	24.29	27.22	21.54	23.26		-0.646667	2.28333	-3.39667	-1.67667		-3.27667	3.60333	-4.33667	-1.16667		9.69114	0.0822789	20.2054	2.24492		SOX-9	0.00340568	0.45508	13.6931	29.6556
	24.48	24.9367	23.83	27.19	21.59	23.28		-1.10667	2.25333	-3.34667	-1.65667		-4.27667	3.46333	-4.81667	-1.20667		19.3823	0.0906636	28.1813	2.30804		TGF-β1	0.000546128	0.0161779	9.80972	25.1896
	24.96	24.9367	23.33	27.87	21.43	22.9		-1.60667	2.93333	-3.50667	-2.03667		-4.69667	3.81333	-4.56667	-1.46667		25.9321	0.0711332	23.6976	2.76383		BMP-2	0.00828237	0.0420779	8.02069	0.102506
IHHBMP 21	22.91	22.72	20.82	21.21	22.7	20.53		-1.9	-1.51	-0.02	-2.19		-5.14333	-4.75333	-2.76333	-4.53333		35.3425	26.9709	6.78963	23.1563
	22.77	22.72	20.89	22.51	23.06	22.26		-1.83	-0.21	0.34	-0.46		-5.19333	-3.95333	-2.99333	-2.92333		36.5889	15.4907	7.96312	7.58597
	22.48	22.72	20.5	22.32	23.1	21.76		-2.22	-0.4	0.38	-0.96		-5.87333	-3.71333	-2.67333	-3.15333		58.6205	13.1167	6.37901	8.89709
																							Mittlerwert ALP
																								Day 3	Day 7	Day 14	Day 21
																							SOX-9	0.000101717	1.71476	0.117062	0.705815
																							TGF-β1	0.000538727	0.306871	96.6104	373.946
																							BMP-2	0.102284	0.467534	281.599	454.53
																							STABW
																								Day 3	Day 7	Day 14	Day 21
																							SOX-9	0	0.781762	0.0329364	0.0266527
																							TGF-β1	0	0.0906652	60.5255	83.0673
																							BMP-2	0.0179356	0.0745354	72.6828	68.5321
