# Supplementary material for: Different types of cartilage neotissue fabricated from collagen hydrogels and mesenchymal stromal cells via SOX9, TGFB1 or BMP2 gene transfer
Source: PLoS One. 2020 Aug 13;15(8):e0237479. doi: 10.1371/journal.pone.0237479 (PMC7425924; doi:10.1371/journal.pone.0237479)
Supplement: S2 Data — (XLSX) [file pone.0237479.s004.xlsx]

## Sheet: Tabelle1
TGFfb1
11.8	11.45	9.74	1.43		ng/ml
11.75	11.5	9.9	1.3
13.2	10.81	8.72	3.48
12.25	11.2533	9.45333	2.07		Mittelwert
0.823104	0.384751	0.640104	1.22282		STABW
0.0394737	0.0631579	0.0289474	0.00123344		NEG
	Tag 3	Tag 7	Tag 14	Tag 21
TGFβ1	19.0447	13.5018	11.6009	0.976053
NEG	0.0394737	0.0631579	0.0289474	0.00123344
	Day 3	Day 7	Day 14	Day 21	MW
GFP	0.04	0.02	0	0
TGF-β1	12.25	11.2533	9.45333	2.07
GFP	0.1	0.1	0	0	StAb
TGF
